# Supplementary material
Source: publisher site journal article supplement (https://www.dovepress.com/article/545702)
Supplement: Supplementary file 1 [file Supplementary%252525C2%252525A0material_1.docx]

| Dear participant,  We are researchers from * Hospital, and we sincerely invite you to participate in our research project. This study aims to understand the knowledge, attitudes, and practices of medical staff in related departments regarding postoperative behavioral changes and emergence agitation in pediatric patients. Your participation in this study is voluntary. If you agree to participate, please refer to the following instructions.  1. Please complete the questionnaire. There are no right or wrong answers. You only need to fill in according to the actual situation. You can ask us any questions during the answering process. Please submit it promptly after completion.  2. This study is a simple questionnaire survey, which will not cause harm to your physical and mental health. However, it will involve some privacy issues, such as your gender, age, etc. We will strictly protect your confidentiality and will not disclose your information. Please feel free to fill it out.  3. As a participant, you can always understand the information and research progress related to this study. If you decide to withdraw from the study, please inform us. Your data will not be included in the research results.  Finally, we sincerely thank you for taking the time to support our scientific research during your busy schedule!  □ I am aware of and agree to the use of the collected data for scientific research.  Informed Consent Signature:    Date of Participation: Year Month Day |
| --- |

**Supplementary figure 1: The questionnaire**

| **Part 1 Basic Information** | |
| --- | --- |
| 1. Your age: | Years |
| 2. Your gender: | a.Male  b.Female |
| 3. Your education: | a. Diploma or below  b. Bachelor's degree  c. Master's degree  d. Doctorate or above |
| 4. Your occupation: | a. Doctor  b. Nurse |
| 5. The department you work in: | a. Anaesthesiology  b. Pediatrics  c. Operating room  d. Other |
| 6. Your work experience: | Years |
| 7. Your professional title: | a. No  b. Junior  c. Intermediate  d. Associate senior  e. Senior |
| 8. Over the past year, on average, how many pediatric general anesthesia surgeries (or postoperative care) have you been involved in per month? | a. Almost never (<1 case/month)  b. 1-10 cases/month  c. 11-20 cases/month  d. 21-30 cases/month  e. 31-50 cases/month  f. >50 cases/month |
| 9. Over the past year, on average, how many cases of postoperative behavioral changes or emergence agitation in pediatric patients undergoing general anesthesia treatment or care have you encountered per month? | a. Almost none (<1 case/month)  b. 1-5 cases/month  c. 6-10 cases/month  d. 11-15 cases/month  e. 16-20 cases/month  f. >20 cases/month |
| 10. Have you participated in training related to postoperative behavioral changes or emergence agitation? | a. Yes  b. No |
| 11. What type(s) of hospital do you work in? (Select all that apply) | a. Public tertiary hospital  b. Public secondary hospital  c. Public primary hospital  d. Private hospital  e. Specialist hospital |
| 12. Is your hospital a teaching hospital? | a. Yes  b. No  c. Unclear |
| 13. Does your hospital have a dedicated anaesthesia recovery room? | a. Yes  b. No  c. Unclear |
| **14.15+7=32** | a. Yes  b. No  c. Unclear |

**Part 2 Knowledge**

**Please select "Very Familiar," "Quite Familiar," or "Not Familiar" based on your understanding of the question.。**

| **1. Postoperative behavioral changes refer to adverse reactions that occur in children during and subsequent to hospitalization.** | a. Very Familiar | b. Quite Familiar | c. Not Familiar |
| --- | --- | --- | --- |
| **2. Postoperative behavioral changes include anxiety, nightmares, eating disorders, tantrums, and enuresis.** | a. Very Familiar | b. Quite Familiar | c. Not Familiar |
| **3. Risk factors for postoperative behavioral changes include age, gender, type of surgery, preoperative anxiety, and intraoperative cerebral oxygen saturation.** | a. Very Familiar | b. Quite Familiar | c. Not Familiar |
| **4. The adjunctive use of dexmedetomidine helps reduce the incidence of postoperative behavioral changes.** | a. Very Familiar | b. Quite Familiar | c. Not Familiar |
| **5. Postoperative behavioral changes are associated with adverse outcomes and can potentially impair the emotional and cognitive development of children.** | a. Very Familiar | b. Quite Familiar | c. Not Familiar |
| **6. The gold standard for evaluating postoperative behavioral changes is the Post Hospital behavioral Questionnaire (PHBQ).** | a. Very Familiar | b. Quite Familiar | c. Not Familiar |
| **7. Postoperative behavioral changes are related to children's tolerance to pain, and analgesia plays a preventive role in mitigating these changes.** | a. Very Familiar | b. Quite Familiar | c. Not Familiar |
| **8. Emergence agitation is a pathological state characterized by psychomotor agitation, excessive activity, and perceptual disturbances, predominantly observed in children aged 2 to 5 years.** | a. Very Familiar | b. Quite Familiar | c. Not Familiar |
| **9. Factors such as incomplete recovery from anesthesia, anesthesia techniques, surgical types, and the child's personality can influencepostoperative behavioral changes.** | a. Very Familiar | b. Quite Familiar | c. Not Familiar |
| **10. Emergence agitation can lead to complications such as accidental removal of catheters, dressings, and subsequent wound bleeding.** | a. Very Familiar | b. Quite Familiar | c. Not Familiar |
| **11. Emergence agitation may be related to factors such as pain, hypoxia, and unfamiliar environment.** | a. Very Familiar | b. Quite Familiar | c. Not Familiar |
| **12. The adjunctive use of dexmedetomidine helps reduce the incidence of emergence agitation.** | a. Very Familiar | b. Quite Familiar | c. Not Familiar |
| **13. Non-pharmacological interventions such as parental accompaniment or psychological intervention.** | a. Very Familiar | b. Quite Familiar | c. Not Familiar |
| **14. Emergence agitation is also preventable through effective analgesia.** | a. Very Familiar | b. Quite Familiar | c. Not Familiar |
| **15. Emergence agitation can be assessed using the Pediatric Anesthesia Emergence Delirium (PAED) scale.** | a. Very Familiar | b. Quite Familiar | c. Not Familiar |
| **16. Proactive follow-up and management of postoperative behavioral changes in children after returning to the ward (and discharge) contribute to their postoperative recovery and rehabilitation.** | a. Very Familiar | b. Quite Familiar | c. Not Familiar |

**Part-III Attitude**

**Please choose from "Strongly Agree" to "Strongly Disagree" based on the description of the question.**

| **1. Preventing postoperative behavioral changes and emergence agitation is vital for the optimal postoperative recovery of children.** | a. Strongly Agree | b. Agree | c. Neutral | d. Disagree | e. Strongly Disagree |
| --- | --- | --- | --- | --- | --- |
| **2. Effective prevention of behavioral changes and emergence agitation helps improve family satisfaction with the treatment.** | a. Strongly Agree | b. Agree | c. Neutral | d. Disagree | e. Strongly Disagree |
| **3. Non-pharmacological interventions such as parental accompaniment and psychological interventions are crucial in the prevention and management of postoperative behavioral changes and emergence agitation.** | a. Strongly Agree | b. Agree | c. Neutral | d. Disagree | e. Strongly Disagree |
| **4. Securing understanding from the parents of children has a positive significance for the prevention of postoperative behavioral changes and emergence agitation.** | a. Strongly Agree | b. Agree | c. Neutral | d. Disagree | e. Strongly Disagree |
| **5. Before surgery, it is essential that potential adverse reactions be comprehensively communicated to patients and families.** | a. Strongly Agree | b. Agree | c. Neutral | d. Disagree | e. Strongly Disagree |
| **6. Standards for postoperative analgesia in children vary among anesthesiologists, and the administration of pediatric analgesia is primarily based on individual experience.** | a. Strongly Agree | b. Agree | c. Neutral | d. Disagree | e. Strongly Disagree |
| **7. Postoperative behavioral can manifest occur after discharge and necessitate ongoing monitoring.** | a. Strongly Agree | b. Agree | c. Neutral | d. Disagree | e. Strongly Disagree |
| **8. Prior to discharge, it is imperative that parents of children be well-informed about potential postoperative behavioral changes.** | a. Strongly Agree | b. Agree | c. Neutral | d. Disagree | e. Strongly Disagree |

**Part IV- Practice**

**Please select the option that best represents your situation based on your choices in the corresponding circumstances.**

| **1. Your frequency of actively learning about perioperative care in paediatric anaesthesia.** | a. Always | b. Often | c. Sometimes | d. Occasionally | e. Never |
| --- | --- | --- | --- | --- | --- |
| **2. Your frequency of educating parents about emergence agitation and postoperative behavioral changes prior to surgery.** | a. Always | b. Often | c. Sometimes | d. Occasionally | e. Never |
| **3. Your frequency of involving parents in preventing postoperative behavioral changes and emergence agitation in children.** | a. Always | b. Often | c. Sometimes | d. Occasionally | e. Never |
| **4. Your frequency of providing psychological interventions to patients (and parents) during the perioperative period.** | a. Always | b. Often | c. Sometimes | d. Occasionally | e. Never |
| **5. Your frequency of using other non-pharmacological methods (such as distraction techniques, white noise therapy, etc.) to prevent postoperative behavioral changes and emergence agitation.** | a. Always | b. Often | c. Sometimes | d. Occasionally | e. Never |
| **6. Your frequency of using analgesic treatments (such as patient-controlled analgesia) in children.** | a. Always | b. Often | c. Sometimes | d. Occasionally | e. Never |
| **7. You routinely assess whether children develop postoperative behavioral changes and emergence agitation.** | a. Always | b. Often | c. Sometimes | d. Occasionally | e. Never |
| **8. When children are discharged, you inform parents about the assessment methods for behavioral changes and recommend a schedule for follow-up.** | a. Always | b. Often | c. Sometimes | d. Occasionally | e. Never |

**Table S1 Correlation Analysis**

|  | Knowledge | Attitude | Practice |
| --- | --- | --- | --- |
|  |  |  |  |
| Knowledge | 1 |  |  |
| Attitude | 0.29 (P<0.001) | 1 |  |
| Practice | 0.28 (P<0.001) | 0.17 (P<0.001) | 1 |
